# Supplementary material
Source: PubMed Central journal article supplement (PMC5495109)

## Legends of Supplementary Figures

**Supplementary Figure 1. Effects of nigericin and valinomycin on the NADH-linked  $\bullet\text{O}_2^-$  generation mediated by the mitochondria isolated from the non-ischemic region (NR) and the risk region (I/R) of 3-h post-ischemic rat heart.** *A.* Measurement of OCR by oxygen polarography as described in the legend of Figure 1. *B.* NADH-linked  $\bullet\text{O}_2^-$  generation mediated by as-isolated mitochondria in the presence of glutamate and malate (NADH-linked) was assessed by EPR spin trapping with DMPO under state 2 (S2) and state 3 (S3) respiratory conditions as described in the legend of Figure 5 ( $n=4$ ,  $*p < 0.05$  and  $**p < 0.01$ ). *C-E.* Effect of nigericin treatment (+Nig.) and valinomycin treatment (+Val.) on the NADH-linked  $\bullet\text{O}_2^-$  generation by mitochondria ( $n=4$ ,  $***p < 0.001$ ). *F.* Representing EPR spectra.

**Supplementary Figure 2. Impairment of glutathione reductase (GR) in isolated mitochondria from the post-ischemic myocardium.** *A and C,* The enzymatic activities of GR in the mitochondria and the tissue homogenates of the myocardium were assayed as described under “Experimental Procedure”. Rats were subjected to a 30 min coronary ligation followed by 24 h of reperfusion. Mitochondria and tissue homogenates were prepared from the myocardium of a non-ischemic region (NR) and an area of risk region (I/R) respectively. *C,* Protein expression of GR in the mitochondria of the post-ischemic myocardium was assessed by Western blot using anti-GR polyclonal Ab. The protein expression level of subunit I (Cox I) of Complex IV in the mitochondria was used as a loading control. The density ratio of the blotting signals between anti-GR and anti-CoX I in *C* was quantitated by the software of Image J.  $*p < 0.05$ ,  $**p < 0.01$ .

Supplementary Figure 1

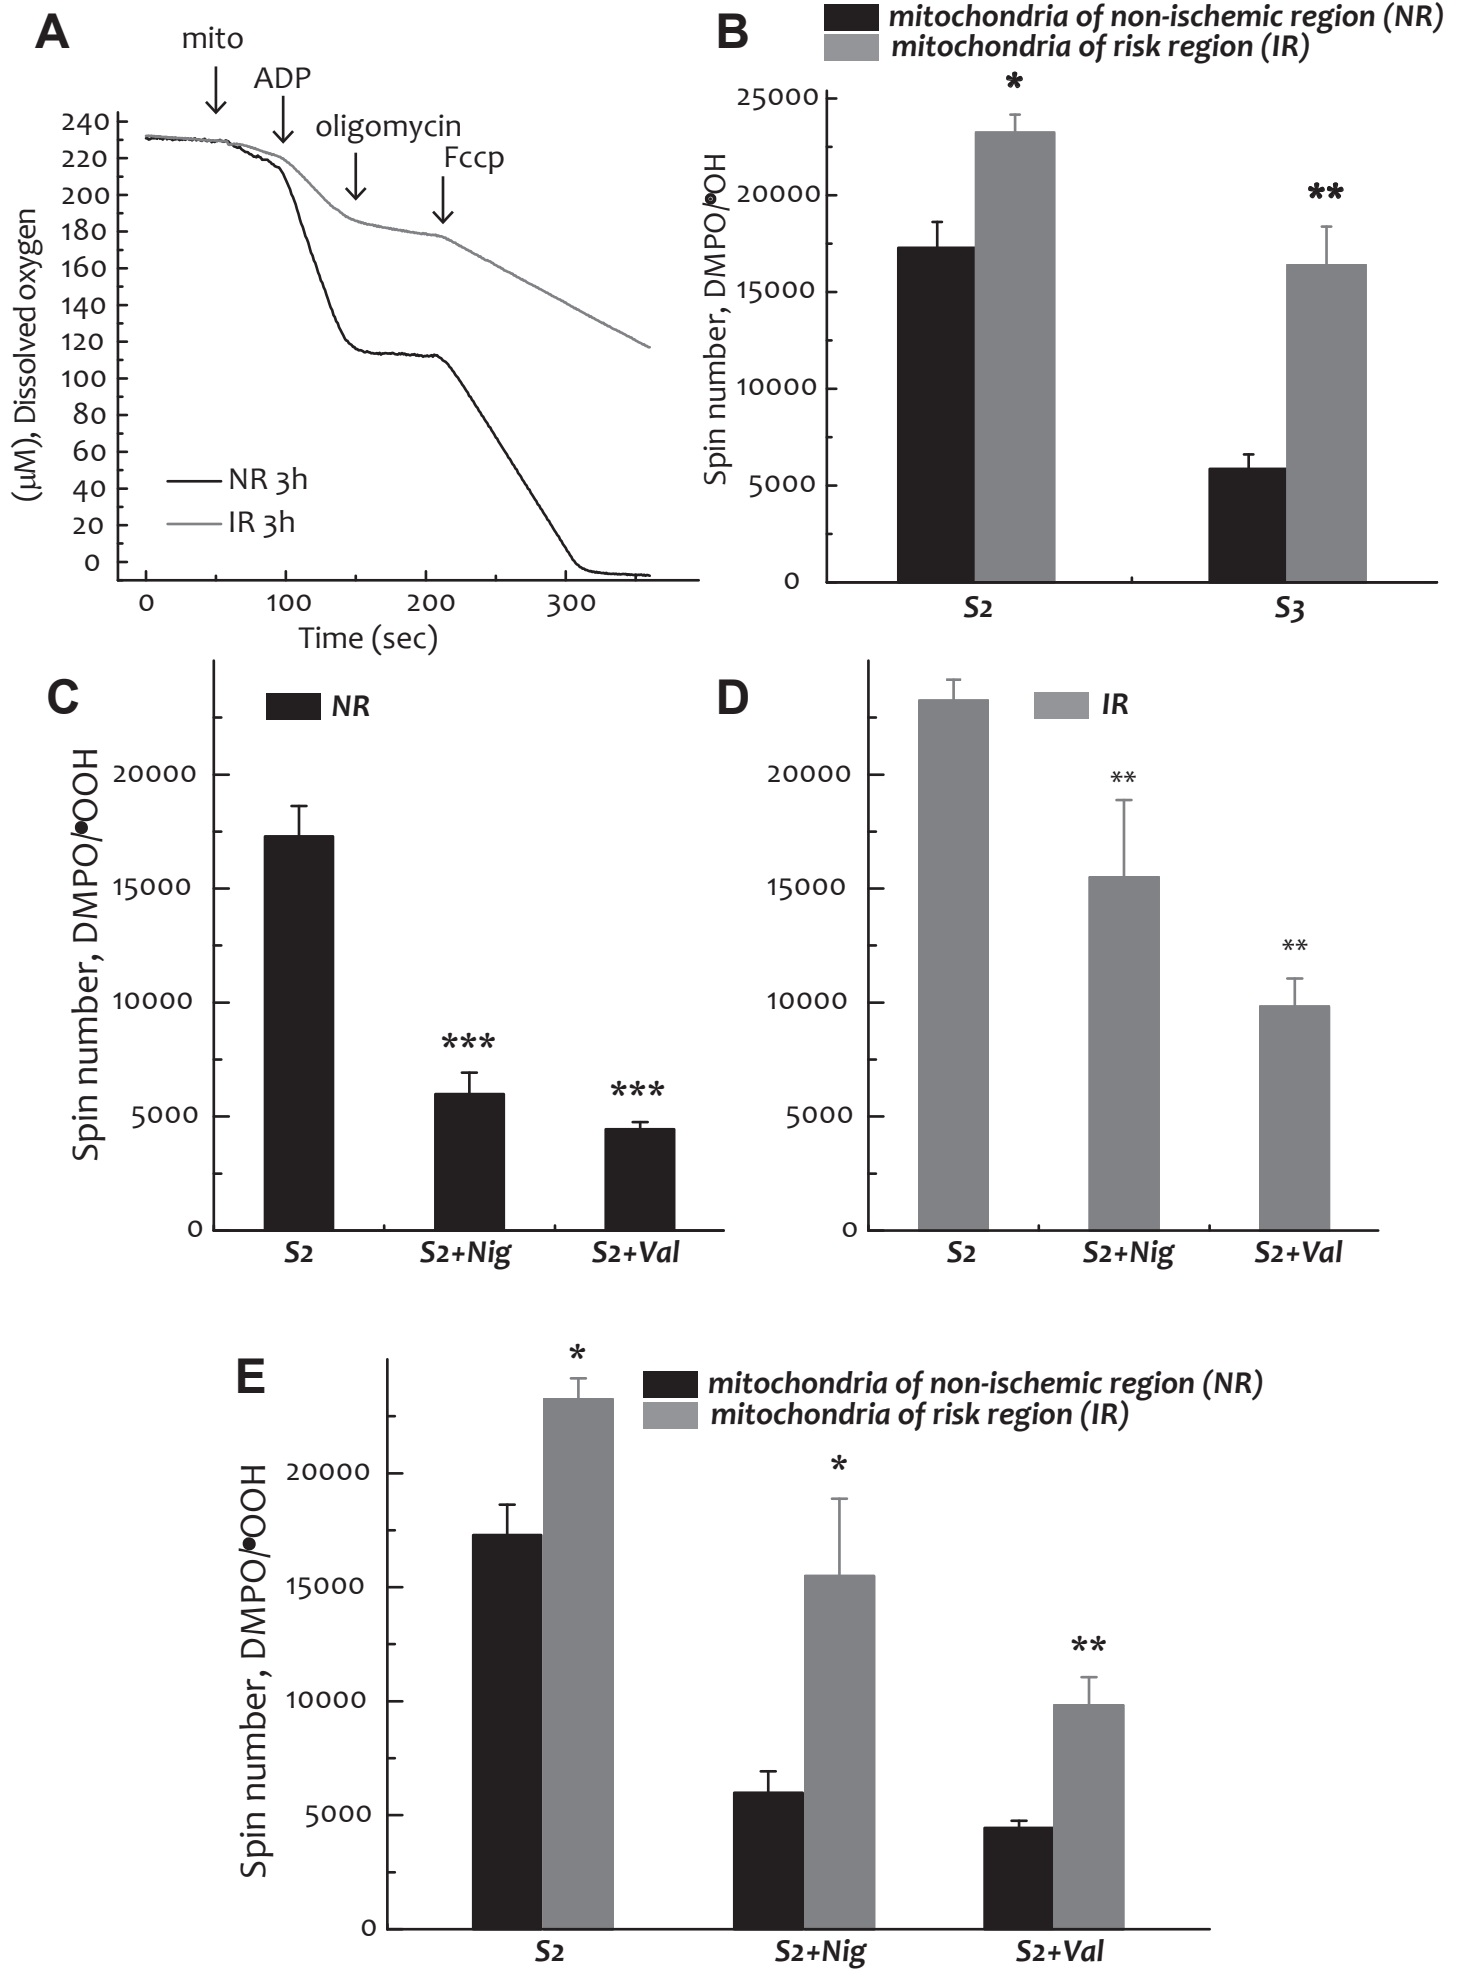

**F**

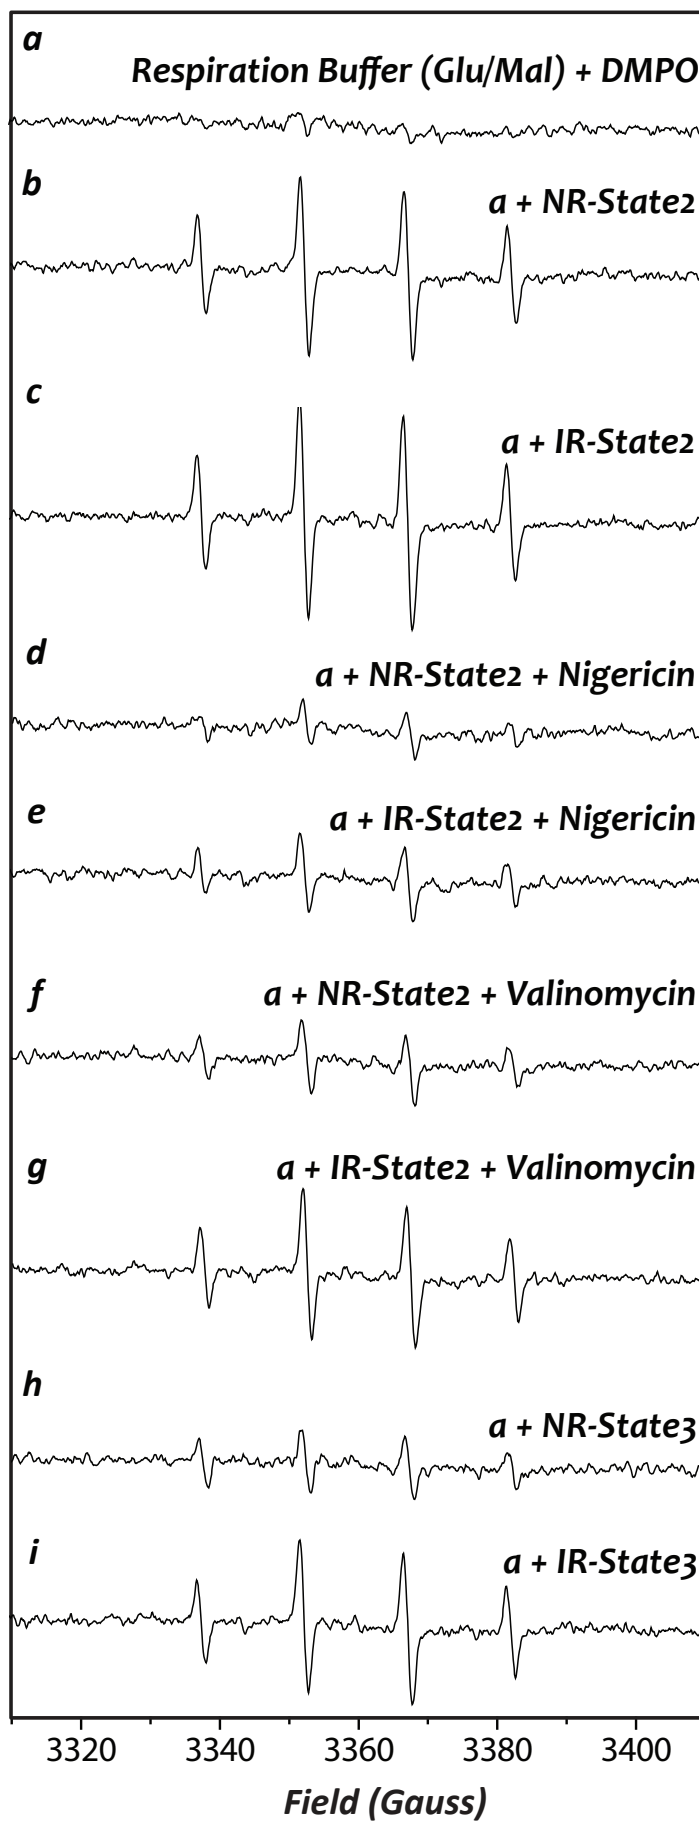

Supplementary Figure 2

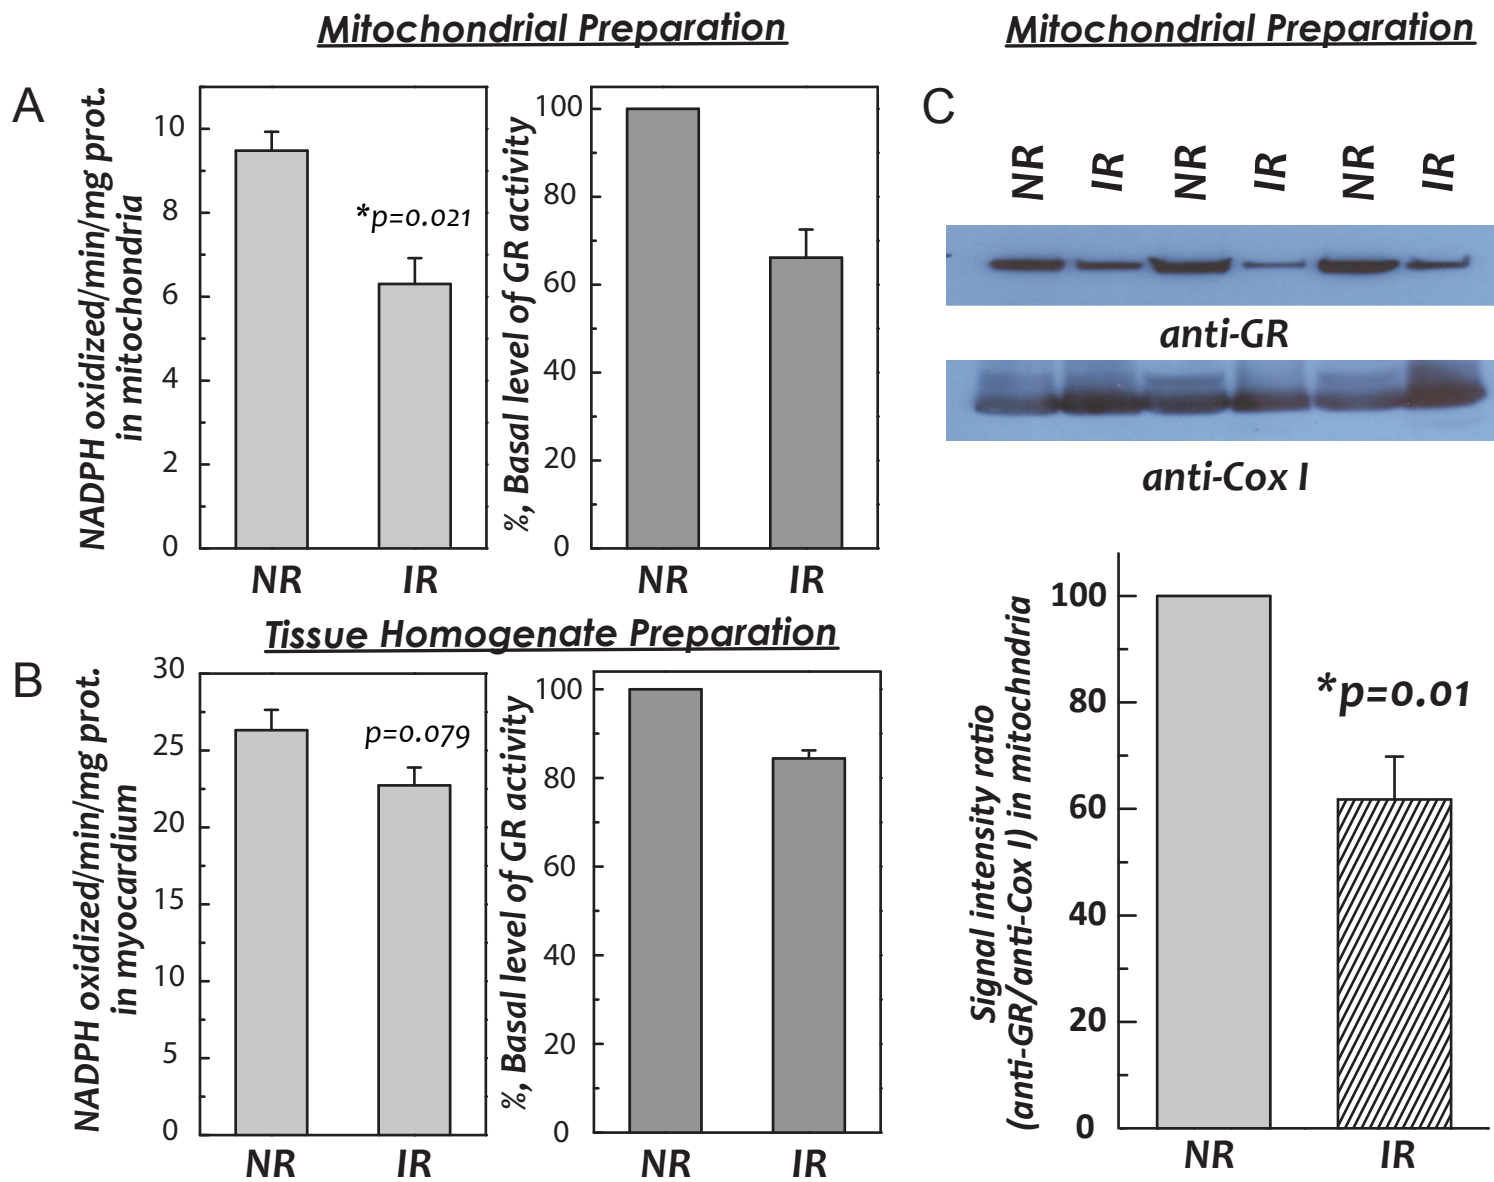

Supplement: NIHMS873519-supplement-supplemental.pdf [file NIHMS873519-supplement-supplemental.pdf]
